# Supplementary material
Source: publisher figshare collection journal article supplement (https://tandf.figshare.com/ndownloader/files/22034316)
Supplement: Supplementary file 1 [file 22034316]

## Supplemental online material

### Evaluation of the reported rates of hypersensitivity reactions associated with iron dextran and ferric carboxymaltose based on global data from VigiBase™ and IQVIA™ MIDAS® over a ten-year period from 2008 to 2017

**Table S1** Terms in the Standardised MedDRA® Query for Anaphylactic reaction

| <b>Group A</b><br>Narrow terms pertaining to hypersensitivity reactions | <b>Group B</b><br>Broad terms pertaining to respiratory reactions potentially related to hypersensitivity | <b>Group C</b><br>Broad terms pertaining to skin reactions potentially related to hypersensitivity | <b>Group D</b><br>Broad terms pertaining to cardiovascular reactions potentially related to hypersensitivity |
|-------------------------------------------------------------------------|-----------------------------------------------------------------------------------------------------------|----------------------------------------------------------------------------------------------------|--------------------------------------------------------------------------------------------------------------|
| Anaphylactic reaction                                                   | Acute respiratory failure                                                                                 | Allergic oedema                                                                                    | Blood pressure decreased                                                                                     |
| Anaphylactic shock                                                      | Asthma                                                                                                    | Angioedema                                                                                         | DBP decreased                                                                                                |
| Anaphylactic transfusion reaction                                       | Bronchial oedema                                                                                          | Erythema                                                                                           | SBP decreased                                                                                                |
| Anaphylactoid reaction                                                  | Bronchospasm                                                                                              | Eye oedema                                                                                         | Cardiac arrest                                                                                               |
| Anaphylactoid shock                                                     | Cardiorespiratory distress                                                                                | Eye pruritus                                                                                       | Cardiorespiratory arrest                                                                                     |
| Circulatory collapse                                                    | Chest discomfort                                                                                          | Eye swelling                                                                                       | Cardiovascular insufficiency                                                                                 |
| First-use syndrome                                                      | Choking                                                                                                   | Eyelid oedema                                                                                      | Diastolic hypotension                                                                                        |
| Kounis syndrome                                                         | Choking sensation                                                                                         | Face oedema                                                                                        | Hypotension                                                                                                  |
| Shock                                                                   | Circumoral oedema                                                                                         | Flushing                                                                                           |                                                                                                              |
| Type I hypersensitivity                                                 | Cough                                                                                                     | Generalized erythema                                                                               |                                                                                                              |
|                                                                         | Cyanosis                                                                                                  | Injection site urticaria                                                                           |                                                                                                              |
|                                                                         | Dyspnoea                                                                                                  | Lip oedema                                                                                         |                                                                                                              |
|                                                                         | Hyperventilation                                                                                          | Lip swelling                                                                                       |                                                                                                              |
|                                                                         | Laryngeal dyspnoea                                                                                        | Ocular hyperaemia                                                                                  |                                                                                                              |
|                                                                         | Laryngeal oedema                                                                                          | Oedema                                                                                             |                                                                                                              |
|                                                                         | Laryngospasm                                                                                              | Periorbital oedema                                                                                 |                                                                                                              |
|                                                                         | Laryngotracheal oedema                                                                                    | Pruritus                                                                                           |                                                                                                              |
|                                                                         | Mouth swelling                                                                                            | Pruritus allergic                                                                                  |                                                                                                              |
|                                                                         | Nasal obstruction                                                                                         | Pruritus generalized                                                                               |                                                                                                              |
|                                                                         | Oedema mouth                                                                                              | Rash                                                                                               |                                                                                                              |
|                                                                         | Oropharyngeal spasm                                                                                       | Rash erythematous                                                                                  |                                                                                                              |
|                                                                         | Oropharyngeal swelling                                                                                    | Rash generalized                                                                                   |                                                                                                              |
|                                                                         | Respiratory arrest                                                                                        | Rash pruritic                                                                                      |                                                                                                              |

|                                |                   |
|--------------------------------|-------------------|
| Respiratory distress           | Skin swelling     |
| Respiratory failure            | Swelling          |
| Reversible airways obstruction | Swelling face     |
| Sensation of foreign body      | Urticaria         |
| Sneezing                       | Urticaria popular |
| Stridor                        |                   |
| Swollen tongue                 |                   |
| Tachypnoea                     |                   |
| Throat tightness               |                   |
| Throat oedema                  |                   |
| Tracheal obstruction           |                   |
| Tracheal oedema                |                   |
| Upper airway obstruction       |                   |
| Wheezing                       |                   |

---

DBP, diastolic blood pressure; MedDRA®, Medical Dictionary for Regulatory Activities; SBP, systolic blood pressure.

## References

Center for Drug Evaluation and Research. Medical review of Injectafer (VIT-45, ferric carboxymaltose injection; FCM) for the treatment of iron deficiency anemia (203565Orig1s000). 2013.  
[https://www.accessdata.fda.gov/drugsatfda\\_docs/nda/2013/203565Orig1s000MedR.pdf](https://www.accessdata.fda.gov/drugsatfda_docs/nda/2013/203565Orig1s000MedR.pdf). Accessed 12 Nov 2019.

Kalra PA, Bhandari S. Safety of intravenous iron use in chronic kidney disease. Curr Opin Nephrol Hypertens. 2016;25:529–535.
